# Supplementary material for: Identifying Balls Feature in a Large-Scale Laser Point Cloud of a Coal Mining Environment by a Multiscale Dynamic Graph Convolution Neural Network
Source: PubMed Central journal article supplement — ACS Omega. 2022 Feb 1;7(6):4892–907. doi: 10.1021/acsomega.1c05473 (PMC8851460; doi:10.1021/acsomega.1c05473), 2022-02-01
Supplement: ao1c05473_si_001.pdf [file ao1c05473_si_001.pdf]

# Supporting Information

## Identifying Balls Feature in Large-scale Laser Point Cloud of Coal Mining Environment by Multi-scale Dynamic Graph Convolution Neural Network

Zhizhong Xing,<sup>†</sup> Shuanfeng Zhao,<sup>\*,†</sup> Wei Guo,<sup>†</sup> Xiaojun Guo,<sup>‡</sup> Yuan Wang,<sup>†</sup> Yunrui Bai,<sup>†</sup> Shibo Zhu,<sup>†</sup> and Haitao He<sup>†,§</sup>

<sup>†</sup> College of Mechanical Engineering, Xi'an University of Science and Technology, Xi'an 710054, China

<sup>‡</sup> School of Mechanical & Automotive Engineering, South China University of Technology, Guangzhou 510641, China

<sup>§</sup> China Energy Group Shendong Coal Group Technology Research Institute, Yulin 719315, China

\*Correspondence to: zsf@xust.edu.cn

Table S1. Main MATLAB R2019a code for generating all geometric features.

---

Generate all geometric feature codes with feature number of 6

---

```
rule_list = [];  
for i1=(0:1)  
    rule_item1 = i1;  
    for i2=(0:1)  
        rule_item2 = rule_item1;  
        rule_item2 = [rule_item2,i2];  
        for i3=(0:1)  
            rule_item3 = rule_item2;  
            rule_item3 = [rule_item3,i3];  
            for i4=(0:1)  
                rule_item4 = rule_item3;  
                rule_item4 = [rule_item4,i4];  
                for i5=(0:1)  
                    rule_item5 = rule_item4;  
                    rule_item5 = [rule_item5,i5];  
                    for i6=(0:1)  
                        rule_item6 = rule_item5;  
                        rule_item6 = [rule_item6,i6];  
                        rule_list = [rule_list;rule_item6];  
                    end  
                end  
            end  
        end  
    end  
end  
end  
end  
end
```

---

Table S2. Main MATLAB R2019a code for adding noise points to geometry point cloud.

---

Randomly generate different numbers of noise points in a certain coordinate range

---

```
random_noise_points_threshold = [10,1000];  
random_noise_range = [0,5;  
                      0,5;  
                      0,5];  
for k=0:1:floor(random_noise_points_threshold(1)+(random_noise_points_threshold(2)-random_n  
oise_points_threshold(1))*rand()  
    x_random = random_noise_range(1,1) + (random_noise_range(1,2)-random_noise_range(  
1,1))*rand();  
    y_random = random_noise_range(2,1) + (random_noise_range(2,2)-random_noise_range(  
2,1))*rand();  
    z_random = random_noise_range(3,1) + (random_noise_range(3,2)-random_noise_range(  
3,1))*rand();  
    all_points = [all_points;x_random,y_random,z_random,0];  
end
```

---
